# Supplementary material for: Repression of Wnt/β-catenin signaling in the anterior endoderm is essential for liver and pancreas development
Source: Oxford University Press journal article supplement (doi:10.1242/dev.001230), 2007-05-17
Supplement: dev001230tables1.pdf [file dev001230tables1.pdf]

**Table S1. Summary of injection experiments**

| Injection                                | Cells injected | Marker analysis                 | Number of embryos |                         |
|------------------------------------------|----------------|---------------------------------|-------------------|-------------------------|
| pt- $\beta$ -catenin (0.25 ng)           | Anterior D1    | 51% repressed <i>for1</i>       | n=70              | Stage 35                |
|                                          |                | 53% repressed <i>pdx1</i>       | n=72              | Stage 35                |
|                                          |                | 32% repressed <i>nkx2.1</i>     | n=65              | Stage 35                |
|                                          |                | 44% repressed <i>c-troponin</i> | n=9               | Stage 35                |
|                                          |                | 74% repressed <i>hhex1</i>      | n=46              | Stage 18                |
|                                          |                | 41% repressed <i>foxa2</i>      | n=22              | Stage 18                |
|                                          |                | 39% ectopic <i>vent2</i>        | n=26              | Stage 18                |
| Gsk3 $\beta$ (0.5 ng)                    | Posterior D4   | 52% ectopic <i>for1</i>         | n=90              | Stage 35                |
|                                          |                | 64% ectopic <i>pdx1</i>         | n=58              | Stage 35                |
|                                          |                | 21% ectopic <i>nkx2.5</i>       | n=19              | Stage 35                |
|                                          |                | 10% ectopic <i>nkx2.1</i>       | n=20              | Stage 35                |
|                                          |                | 40% ectopic <i>ambp</i>         | n=5               | Stage 42                |
|                                          |                | 44% ectopic <i>elastase</i>     | n=9               | Stage 42                |
|                                          |                | 0% ectopic <i>insulin</i>       | n=13              | Stage 42                |
|                                          |                | 60% ectopic <i>amylase</i>      | n=5               | Stage 42                |
|                                          |                | 75% ectopic <i>ptf1a</i>        | n=8               | Stage 42                |
|                                          |                | 49% ectopic <i>hhex</i>         | n=220             | Stage 18                |
|                                          |                | 46% increased <i>foxa2</i>      | n=59              | Stage 18                |
|                                          |                | 71% repressed <i>endocut</i>    | n=17              | Stage 35                |
|                                          |                | 47% repressed <i>vent2</i>      | n=47              | Stage 18                |
|                                          |                | $\Delta$ NTcf3 (0.8 ng)         | Posterior D4      | 50% ectopic <i>for1</i> |
| 69% ectopic <i>pdx1</i>                  | n=13           |                                 |                   | Stage 35                |
| 52% ectopic <i>hhex</i>                  | n=21           |                                 |                   | Stage 18                |
| 87% repressed <i>vent2</i>               | n=16           |                                 |                   | Stage 18                |
| $\beta$ -catenin-MO (40 ng)              | Posterior D4   | 49% ectopic <i>hhex</i>         | n=33              | Stage 18                |
|                                          |                | 68% repressed <i>vent2</i>      | n=37              | Stage 18                |
| Gsk3 $\beta$ (0.5 ng)<br>+Hex-MO (80 ng) | Posterior D4   | 0% ectopic <i>for1</i>          | n=45              | Stage 35                |
|                                          |                | 0% ectopic <i>pdx1</i>          | n=34              | Stage 35                |
| Hex-MO (80 ng)                           | Anterior D1    | 100% repressed <i>for1</i>      | n=28              | Stage 35                |
|                                          |                | 86% repressed <i>pdx1</i>       | n=14              | Stage 35                |
| Gsk3 $\beta$ (0.5 ng)<br>+Vent2 (0.5 ng) | Posterior D4   | 0% ectopic <i>for1</i>          | n=39              | Stage 35                |
|                                          |                | 5% ectopic <i>pdx1</i>          | n=22              | Stage 35                |
|                                          |                | 4% ectopic <i>hhex</i>          | n=57              | Stage 18                |
| Vent2 (0.5 ng)                           | Anterior D1    | 47% repressed <i>for1</i>       | n=27              | Stage 35                |
|                                          |                | 54% repressed <i>pdx1</i>       | n=31              | Stage 35                |
|                                          |                | 63% repressed <i>hhex</i>       | n=62              | Stage 18                |
|                                          |                | 47% repressed <i>foxa2</i>      | n=15              | Stage 18                |
